# Supplementary material for: Effect of Burnout Due to Heavy Workload on Surgical Residents: A Multi-National Cross-Sectional Study
Source: Research Square preprint supplement (doi:10.21203/rs.3.rs-7101378/v1), 2025-07-23
Supplement: Supplementary file 1 [file a2c3a8c1704552585c00f55b.pdf]

# Burnout Assessment Questionnaire for Surgical Residents: a cross-sectional study

Consent form for cross-sectional study

\* Indicates required question

---

**Study title:** *Effect of the burnout due to heavy workload on surgeons' residence: a cross-sectional study.*

Supervisor: **Prof.Dr.Mohammed Sofar**

**R: Mohammed Ehmidat**

## **INTRODUCTION**

You are invited to participate in a cross-sectional study conducted by researchers from a different faculty medicine. The aim of this study is to assess the prevalence and severity of burnout among surgical residents and to evaluate the impact of heavy workload on their emotional well-being, professional performance, and personal life. Additionally, the study seeks to identify potential factors contributing to burnout and explore possible support mechanisms within surgical training programs.

## **Study Procedure**

If you choose to participate, you are required to complete all sections of the questionnaire thoroughly.

## **Confidentiality and security**

Your response will be kept confidential and anonymous. Your data will be stored securely, and only authorized researchers will have access.

Your identity will remain confidential.

## **Consent to participate:**

Upon reading the consent statement above, by proceeding to complete the questionnaire, you are providing voluntary agreement to participate in the study and granting consent for the use of your anonymous data for research purposes.

We appreciate your voluntary participation in this study.

Thank you

1. I voluntarily agree to participate in this study and consent to the use of my anonymous data for research purposes

*Mark only one oval.*

☐ I agree

☐ I don't agree

### Demographic data

2. You know about this assessment from \*

*Mark only one oval.*

|                       |                       |                       |                       |                       |                       |                       |                       |                       |                       |
|-----------------------|-----------------------|-----------------------|-----------------------|-----------------------|-----------------------|-----------------------|-----------------------|-----------------------|-----------------------|
| 1                     | 2                     | 3                     | 4                     | 5                     | 6                     | 7                     | 8                     | 9                     | 10                    |
| <input type="radio"/> |

3. Age \*

---

4. Gender \*

*Mark only one oval.*

☐ Male

☐ Female

5. The country where surgical training is being conducted \*

*Mark only one oval.*

- ☐ Egypt
- ☐ Jordan
- ☐ Palestine

6. affiliated hospital for surgical training \*

---

7. Year of surgical training \*

*Mark only one oval.*

- ☐ 1
- ☐ 2
- ☐ 3
- ☐ 4
- ☐ 5
- ☐ 6

## Section A: Emotional Exhaustion

8. I feel emotionally drained by my surgical training \*

*Mark only one oval.*

- ☐ Strongly disagree
- ☐ Disagree
- ☐ Neutral
- ☐ Agree
- ☐ Strongly agree

9. I feel fatigued when I get up in the morning and have to face another day on the wards or in the OR.

*Mark only one oval.*

- ☐ Strongly disagree
- ☐ Disagree
- ☐ Neutral
- ☐ Agree
- ☐ Strongly agree

10. I feel frustrated by the demands of residency. \*

*Mark only one oval.*

- ☐ Strongly disagree
- ☐ Disagree
- ☐ Neutral
- ☐ Agree
- ☐ Strongly agree

11. I feel I'm working too hard during my residency. \*

*Mark only one oval.*

- ☐ Strongly disagree
- ☐ Disagree
- ☐ Neutral
- ☐ Agree
- ☐ Strongly agree

**Section B: Workload and Support**

12. I frequently work longer than 80 hours a week. \*

*Mark only one oval.*

- ☐ Strongly disagree
- ☐ Disagree
- ☐ Neutral
- ☐ Agree
- ☐ Strongly agree

13. I have sufficient time to rest and recover between shifts. \*

*Mark only one oval.*

- ☐ Strongly disagree
- ☐ Disagree
- ☐ Neutral
- ☐ Agree
- ☐ Strongly agree

14. I feel that the workload has affected my relationships and personal life. \*

*Mark only one oval.*

- ☐ Strongly disagree
- ☐ Disagree
- ☐ Neutral
- ☐ Agree
- ☐ Strongly Agree

15. I believe the workload affects my performance negatively. \*

*Mark only one oval.*

- ☐ Strongly disagree
- ☐ Disagree
- ☐ Neutral
- ☐ Agree
- ☐ Strongly agree

16. I feel that the workload has affected my physical health. \*

*Mark only one oval.*

- ☐ Strongly disagree
- ☐ Disagree
- ☐ Neutral
- ☐ Agree
- ☐ Strongly agree

### **Section C: Depersonalization**

17. I feel I treat patients as if they were impersonal objects. \*

*Mark only one oval.*

- ☐ Strongly disagree
- ☐ Disagree
- ☐ Neutral
- ☐ Agree
- ☐ Strongly Agree

18. I've become more callous toward people since I started residency. \*

*Mark only one oval.*

- ☐ Strongly disagree
- ☐ Disagree
- ☐ Neutral
- ☐ Agree
- ☐ Strongly Agree

19. I feel indifferent toward patients' problems. \*

*Mark only one oval.*

- ☐ Strongly disagree
- ☐ Disagree
- ☐ Neutral
- ☐ Agree
- ☐ Strongly agree

---

This content is neither created nor endorsed by Google.

# Google Forms
